# Supplementary material
Source: publisher figshare collection journal article supplement (https://frontiersin.figshare.com/ndownloader/files/27191315)
Supplement: Supplementary file [file 27191315]

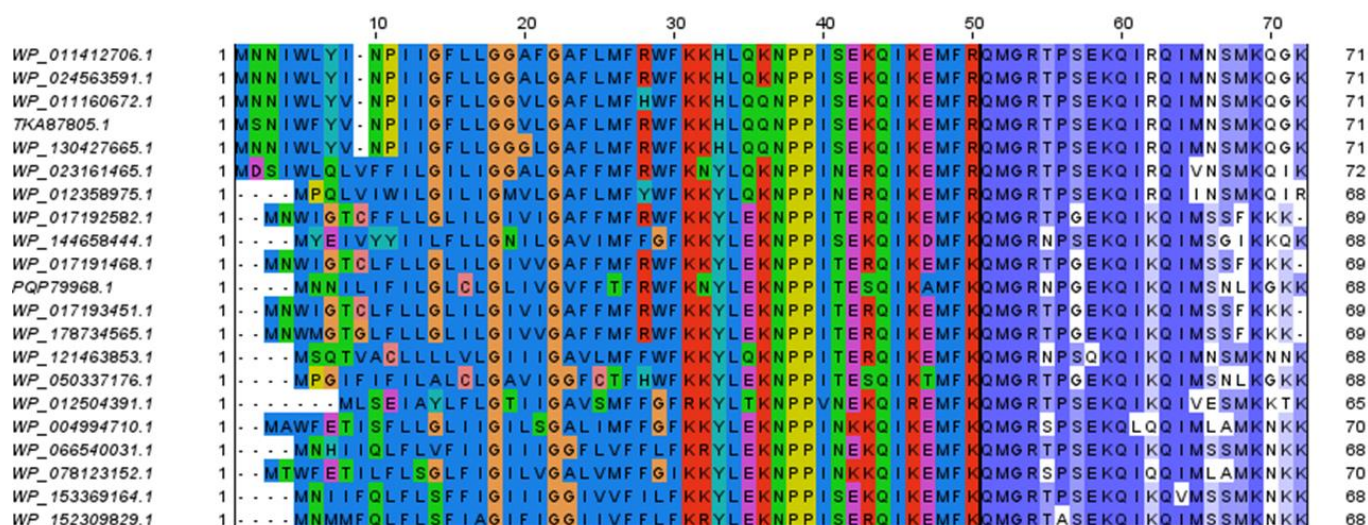

**Supplementary Figure S7.** Sequence alignment for the YneF family. The residues have been colored according to biochemical properties up to position 50 of the alignment, and the remaining of the alignment is colored according to conservation between sequences with violet shades.
